# Supplementary material for: CCD-optimized Moringa oleifera-based hydrogel for the targeted and controlled release of the anti-cancer drug Raloxifene: evaluation of hemocompatible, cytotoxic and antioxidant properties
Source: Royal Society of Chemistry journal article supplement (doi:10.1039/d3nj05816f), 2024-01-01
Supplement: d3nj05816f1.pdf [file d3nj05816f1.pdf]

## CCD-Optimized *Moringa oleifera*-Based Hydrogel for the Targeted and Controlled Release of the Anti-Cancer Drug Raloxifene: Evaluation of Hemocompatible, Cytotoxic and Antioxidant Properties

Priyanka Mankotia<sup>1</sup>, Kashma Sharma<sup>2</sup>, Yogendra Kumar Mishra<sup>3#</sup>, Vishal Sharma<sup>1#</sup>, Vijay Kumar<sup>4#</sup>

<sup>1</sup>Institute of Forensic Science & Criminology, Panjab University, Chandigarh, India

<sup>2</sup>Department of Chemistry, DAV College, Sector-10, Chandigarh

<sup>3</sup>Smart Materials, NanoSYD, Mads Clausen Institute, University of Southern Denmark, Alsion 2, Sønderborg, 6400 Denmark

<sup>4</sup>Department of Physics, National Institute of Technology Srinagar, Jammu and Kashmir – 190006, India

**Corresponding author(s):** Vishal Sharma (vishalsharma.pu@gmail.com); Yogendra Kumar Mishra (mishra@mci.sdu.dk); Vijay Kumar (vj.physics@gmail.com)

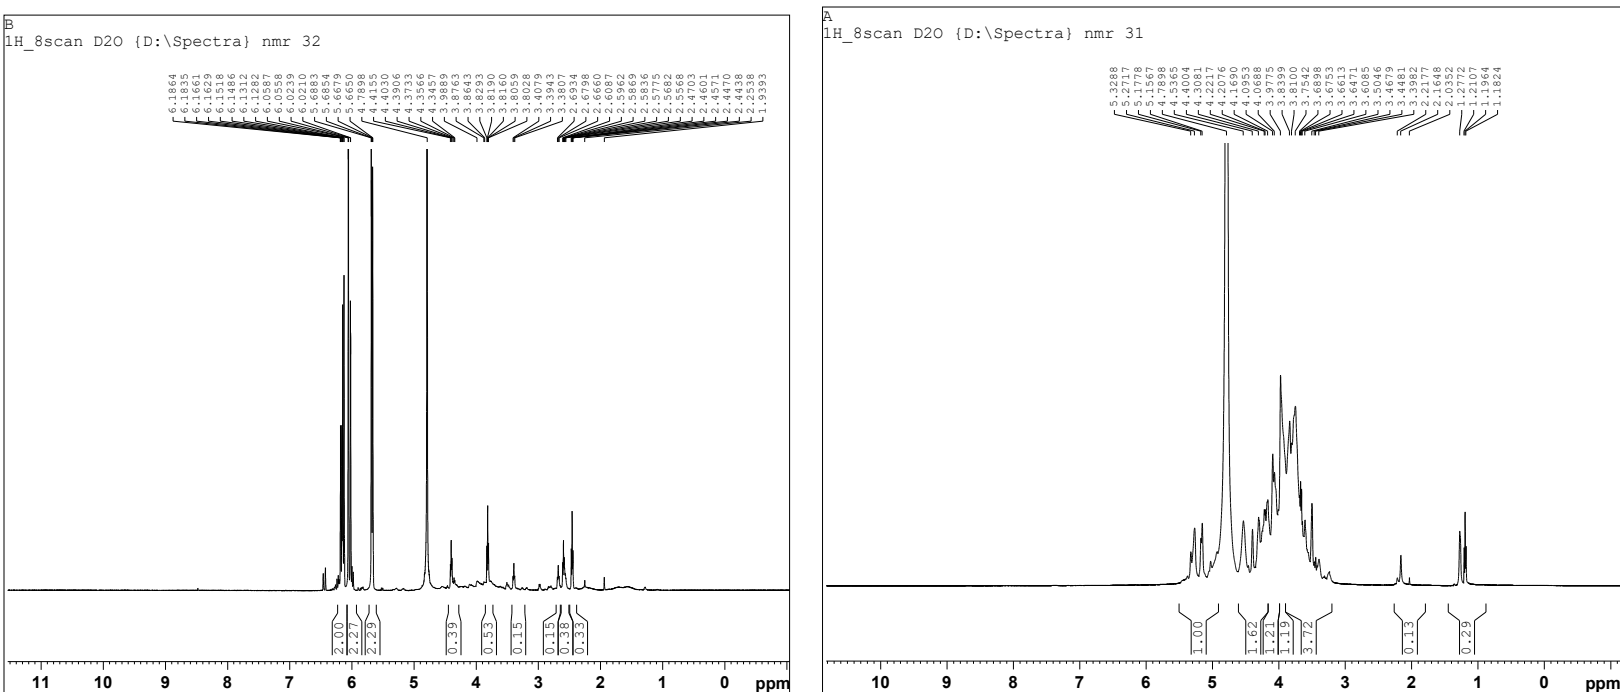

Figure S1: Complete <sup>1</sup>H-NMR spectra of (a) MO gum (b) MO-g-poly(AA)
